# Supplementary material for: Central body fatness is a stronger predictor of cancer risk than overall body size
Source: PubMed Central journal article supplement (PMC6342989; doi:10.1038/s41467-018-08159-w), 2019-01-22
Supplement: 41467_2018_8159_MOESM1_ESM.pdf [file 41467_2018_8159_MOESM1_ESM.pdf]

## **Supplementary Information**

Central body fatness is a stronger predictor of cancer risk than overall body size

Barberio et al.

## Supplementary Tables:

Supplementary Table 1. Results from analyses of BMI categories<sup>1</sup> and cancer incidence for cancers occurring greater than two years after baseline data collection (n=26 078)

|                                | MALES (n=9 861) |                                            | FEMALES (n=16 217) |                                            |
|--------------------------------|-----------------|--------------------------------------------|--------------------|--------------------------------------------|
|                                | Cases           | Latency Multivariate-adjusted <sup>2</sup> | Cases              | Latency Multivariate-adjusted <sup>2</sup> |
| All-cancers                    |                 |                                            |                    |                                            |
| Normal                         | 157             | 1.0 (Ref)                                  | 390                | 1.0 (Ref)                                  |
| Overweight                     | 404             | 1.10 (0.91, 1.32)                          | 379                | 1.0 (0.86, 1.15)                           |
| Obese                          | 301             | 1.43** (1.17, 1.74)                        | 373                | 1.26** (1.08, 1.46)                        |
| <i>P for trend</i>             |                 | <0.001                                     |                    | <0.01                                      |
| Prostate cancer                |                 |                                            |                    |                                            |
| Normal                         | 63              | 1.0 (Ref)                                  | --                 | --                                         |
| Overweight                     | 174             | 1.15 (0.86, 1.54)                          | --                 | --                                         |
| Obese                          | 101             | 1.20 (0.87, 1.65)                          | --                 | --                                         |
| <i>P for trend</i>             |                 | 0.29                                       |                    | --                                         |
| Breast cancer – Premenopausal  |                 |                                            |                    |                                            |
| Normal                         | --              | --                                         | 87                 | 1.0 (Ref)                                  |
| Overweight                     | --              | --                                         | 47                 | 0.78 (0.54, 1.11)                          |
| Obese                          | --              | --                                         | 33                 | 0.76 (0.50, 1.15)                          |
| <i>P for trend</i>             |                 | --                                         |                    | 0.14                                       |
| Breast cancer – Postmenopausal |                 |                                            |                    |                                            |
| Normal                         | --              | --                                         | 77                 | 1.0 (Ref)                                  |
| Overweight                     | --              | --                                         | 78                 | 0.90 (0.65, 1.23)                          |
| Obese                          | --              | --                                         | 85                 | 1.21 (0.88, 1.67)                          |
| <i>P for trend</i>             |                 | --                                         |                    | 0.25                                       |
| Endometrial cancer             |                 |                                            |                    |                                            |
| Normal                         | --              | --                                         | 16                 | 1.0 (Ref)                                  |
| Overweight                     | --              | --                                         | 24                 | 1.73† (0.92, 3.28)                         |
| Obese                          | --              | --                                         | 57                 | 4.98** (2.81, 8.85)                        |
| <i>P for trend</i>             |                 | --                                         |                    | <0.001                                     |
| Colon cancer                   |                 |                                            |                    |                                            |
| Normal                         | 7               | 1.0 (Ref)                                  | 21                 | 1.0 (Ref)                                  |
| Overweight                     | 32              | 1.82 (0.80, 4.14)                          | 42                 | 1.99** (1.17, 3.38)                        |
| Obese                          | 34              | 3.20** (1.40, 7.32)                        | 27                 | 1.66† (0.92, 2.99)                         |
| <i>P for trend</i>             |                 | <0.001                                     |                    | 0.09                                       |
| Lung cancer                    |                 |                                            |                    |                                            |
| Normal                         | 16              | 1.0 (Ref)                                  | 47                 | 1.0 (Ref)                                  |
| Overweight                     | 25              | 0.70 (0.37, 1.33)                          | 42                 | 0.79 (0.52, 1.21)                          |
| Obese                          | 19              | 0.83 (0.41, 1.65)                          | 26                 | 0.61* (0.37, 1.00)                         |
| <i>P for trend</i>             |                 | 0.65                                       |                    | 0.05                                       |
| Leukemia                       |                 |                                            |                    |                                            |
| Normal                         | 11              | 1.0 (Ref)                                  | 13                 | 1.0 (Ref)                                  |
| Overweight                     | 21              | 0.89 (0.42, 1.86)                          | 14                 | 1.01 (0.47, 2.17)                          |
| Obese                          | 15              | 1.16 (0.52, 2.57)                          | 8                  | 0.69 (0.28, 1.73)                          |
| <i>P for trend</i>             |                 | 0.68                                       |                    | 0.46                                       |
| Non-Hodgkin lymphoma           |                 |                                            |                    |                                            |
| Normal                         | 7               | 1.0 (Ref)                                  | 10                 | 1.0 (Ref)                                  |
| Overweight                     | 17              | 1.11 (0.46, 2.71)                          | 15                 | 1.46 (0.65, 3.28)                          |
| Obese                          | 24              | 2.60* (1.10, 6.15)                         | 15                 | 1.82 (0.80, 4.15)                          |
| <i>P for trend</i>             |                 | 0.01                                       |                    | 0.15                                       |
| Hematological cancers          |                 |                                            |                    |                                            |
| Normal                         | 19              | 1.0 (Ref)                                  | 24                 | 1.0 (Ref)                                  |
| Overweight                     | 39              | 0.94 (0.54, 1.64)                          | 30                 | 1.22 (0.71, 2.10)                          |
| Obese                          | 39              | 1.64† (0.93, 2.88)                         | 24                 | 1.23 (0.68, 2.20)                          |
| <i>P for trend</i>             |                 | 0.04                                       |                    | 0.49                                       |

Note: Hazard ratios (HRs) and 95% confidence intervals (CIs) from Cox regression models are presented

<sup>1</sup>Normal =  $\geq 18.5$  to  $< 25$  kg/m<sup>2</sup>; Overweight =  $\geq 25$  to  $< 30$  kg/m<sup>2</sup>; Obese =  $\geq 30$  kg/m<sup>2</sup>

Those with a BMI  $< 18.5$  kg/m<sup>2</sup> were excluded from these analyses

<sup>2</sup>Adjusted for: age (continuous), ethnicity (white/other), marital status (married or living with someone/divorced, separated, or widowed/single, never married), highest level of education (high school or less/some post-high school education/post-high school certificate or degree), total household income (\$0 to \$49,999/\$50,000 to \$99,999/ $\geq$  \$100,000), geographical area of residence (urban/rural), smoking status (current/former/never), alcohol consumption (grams of ethanol per day), energy intake (kilocalories per day), total physical activity (MET-hours per week), history of diabetes (yes/no), family history of cancer (yes/no), pack-years of cigarettes (lung cancer only), fibre intake (grams per day) (colon cancer only), menopausal status (pre-menopause/post-menopause) (endometrial cancers), years of birth control use (0 to 5 years/ $> 5$  years), (breast and endometrial cancers), history of breast cancer screening (yes/no) (breast cancer only), history of colon cancer screening (yes/no) (colon cancer only), and history of prostate cancer screening (yes/no) (prostate cancer only)

\*\*p $< 0.01$ , \*p $< 0.05$ , †p $< 0.1$

Supplementary Table 2. Results from analyses of BMI categories<sup>1</sup> and cancer incidence among ATP participants with BMI  $\geq 18.5$  kg/m<sup>2</sup> adjusting for all covariates and dichotomous WC (n=25 499)

|                                | MALES (n=9 749) |                                    |       |                                    | FEMALES (n=15 750) |                                    |       |                                    |
|--------------------------------|-----------------|------------------------------------|-------|------------------------------------|--------------------|------------------------------------|-------|------------------------------------|
|                                | Cases           | Multivariate-adjusted <sup>2</sup> | Cases | Multivariate-adjusted <sup>3</sup> | Cases              | Multivariate-adjusted <sup>2</sup> | Cases | Multivariate-adjusted <sup>3</sup> |
| All-cancer                     |                 |                                    |       |                                    |                    |                                    |       |                                    |
| Normal                         | 185             | 1.0 (Ref)                          | 185   | 1.0 (Ref)                          | 447                | 1.0 (Ref)                          | 447   | 1.0 (Ref)                          |
| Overweight                     | 471             | 1.08 (0.91, 1.29)                  | 471   | 1.04 (0.87, 1.25)                  | 418                | 0.95 (0.83, 1.09)                  | 416   | 0.91 (0.78, 1.06)                  |
| Obese                          | 331             | 1.33** (1.10, 1.60)                | 328   | 1.20 (0.94, 1.52)                  | 420                | 1.22** (1.06, 1.40)                | 416   | 1.11 (0.90, 1.35)                  |
| <i>P for trend</i>             |                 | <0.001                             |       | 0.12                               |                    | <0.01                              |       | 0.30                               |
| Prostate cancer                |                 |                                    |       |                                    |                    |                                    |       |                                    |
| Normal                         | 72              | 1.0 (Ref)                          | 72    | 1.0 (Ref)                          | --                 | --                                 | --    | --                                 |
| Overweight                     | 205             | 1.17 (0.89, 1.53)                  | 205   | 1.12 (0.84, 1.49)                  | --                 | --                                 | --    | --                                 |
| Obese                          | 115             | 1.17 (0.87, 1.58)                  | 114   | 1.03 (0.71, 1.51)                  | --                 | --                                 | --    | --                                 |
| <i>P for trend</i>             |                 | 0.34                               |       | 0.91                               |                    | --                                 |       | --                                 |
| Breast cancer – Premenopausal  |                 |                                    |       |                                    |                    |                                    |       |                                    |
| Normal                         | --              | --                                 | --    | --                                 | 98                 | 1.0 (Ref)                          | 98    | 1.0 (Ref)                          |
| Overweight                     | --              | --                                 | --    | --                                 | 50                 | 0.73† (0.52, 1.04)                 | 50    | 0.65* (0.43, 0.97)                 |
| Obese                          | --              | --                                 | --    | --                                 | 34                 | 0.69† (0.46, 1.04)                 | 34    | 0.53* (0.30, 0.95)                 |
| <i>P for trend</i>             |                 | --                                 |       | --                                 |                    | 0.04                               |       | 0.02                               |
| Breast cancer - Postmenopausal |                 |                                    |       |                                    |                    |                                    |       |                                    |
| Normal                         | --              | --                                 | --    | --                                 | 85                 | 1.0 (Ref)                          | 85    | 1.0 (Ref)                          |
| Overweight                     | --              | --                                 | --    | --                                 | 89                 | 0.92 (0.69, 1.25)                  | 89    | 0.90 (0.63, 1.27)                  |
| Obese                          | --              | --                                 | --    | --                                 | 99                 | 1.26 (0.93, 1.71)                  | 99    | 1.20 (0.77, 1.85)                  |
| <i>P for trend</i>             |                 | --                                 |       | --                                 |                    | 0.13                               |       | 0.36                               |
| Endometrial cancer             |                 |                                    |       |                                    |                    |                                    |       |                                    |
| Normal                         | --              | --                                 | --    | --                                 | 20                 | 1.0 (Ref)                          | 20    | 1.0 (Ref)                          |
| Overweight                     | --              | --                                 | --    | --                                 | 26                 | 1.48 (0.82, 2.67)                  | 26    | 1.23 (0.62, 2.42)                  |
| Obese                          | --              | --                                 | --    | --                                 | 65                 | 4.52** (2.69, 7.61)                | 64    | 3.12** (1.43, 6.81)                |
| <i>P for trend</i>             |                 | --                                 |       | --                                 |                    | <0.001                             |       | <0.001                             |
| Colon cancer                   |                 |                                    |       |                                    |                    |                                    |       |                                    |
| Normal                         | 9               | 1.0 (Ref)                          | 9     | 1.0 (Ref)                          | 26                 | 1.0 (Ref)                          | 26    | 1.0 (Ref)                          |
| Overweight                     | 37              | 1.66 (0.79, 3.45)                  | 37    | 1.56 (0.72, 3.38)                  | 48                 | 1.80* (1.11, 2.92)                 | 48    | 1.80* (1.05, 3.08)                 |
| Obese                          | 36              | 2.71** (1.28, 5.70)                | 35    | 2.28† (0.92, 5.67)                 | 32                 | 1.49 (0.87, 2.56)                  | 32    | 1.48 (0.73, 3.00)                  |
| <i>P for trend</i>             |                 | <0.001                             |       | 0.07                               |                    | 0.14                               |       | 0.33                               |
| Lung cancer                    |                 |                                    |       |                                    |                    |                                    |       |                                    |
| Normal                         | 18              | 1.0 (Ref)                          | 18    | 1.0 (Ref)                          | 51                 | 1.0 (Ref)                          | 51    | 1.0 (Ref)                          |
| Overweight                     | 32              | 0.78 (0.43, 1.41)                  | 32    | 0.52† (0.25, 1.07)                 | 46                 | 0.80 (0.53, 1.19)                  | 46    | 0.82 (0.51, 1.31)                  |
| Obese                          | 19              | 0.71 (0.37, 1.39)                  | 19    | 0.36* (0.14, 0.90)                 | 28                 | 0.59* (0.36, 0.95)                 | 28    | 0.61 (0.32, 1.16)                  |
| <i>P for trend</i>             |                 | 0.33                               |       | 0.03                               |                    | 0.03                               |       | 0.14                               |
| Leukemia                       |                 |                                    |       |                                    |                    |                                    |       |                                    |
| Normal                         | 12              | 1.0 (Ref)                          | 12    | 1.0 (Ref)                          | 17                 | 1.0 (Ref)                          | 17    | 1.0 (Ref)                          |
| Overweight                     | 23              | 0.88 (0.43, 1.78)                  | 23    | 0.82 (0.38, 1.75)                  | 14                 | 0.76 (0.37, 1.55)                  | 14    | 0.57 (0.24, 1.36)                  |
| Obese                          | 17              | 1.15 (0.54, 2.46)                  | 17    | 0.96 (0.35, 2.65)                  | 11                 | 0.68 (0.31, 1.52)                  | 11    | 0.42 (0.14, 1.27)                  |
| <i>P for trend</i>             |                 | 0.67                               |       | 0.94                               |                    | 0.33                               |       | 0.13                               |
| Non-Hodgkin lymphoma           |                 |                                    |       |                                    |                    |                                    |       |                                    |
| Normal                         | 8               | 1.0 (Ref)                          | 8     | 1.0 (Ref)                          | 13                 | 1.0 (Ref)                          | 13    | 1.0 (Ref)                          |
| Overweight                     | 19              | 1.08 (0.47, 2.49)                  | 19    | 0.94 (0.39, 2.30)                  | 16                 | 1.20 (0.57, 2.50)                  | 16    | 1.41 (0.63, 3.16)                  |
| Obese                          | 26              | 2.47* (1.10, 5.57)                 | 26    | 1.77 (0.60, 5.16)                  | 16                 | 1.46 (0.69, 3.11)                  | 16    | 2.07 (0.70, 6.11)                  |
| <i>P for trend</i>             |                 | 0.01                               |       | 0.18                               |                    | 0.32                               |       | 0.19                               |
| Hematological cancers          |                 |                                    |       |                                    |                    |                                    |       |                                    |
| Normal                         | 21              | 1.0 (Ref)                          | 21    | 1.0 (Ref)                          | 31                 | 1.0 (Ref)                          | 31    | 1.0 (Ref)                          |
| Overweight                     | 43              | 0.93 (0.55, 1.58)                  | 43    | 0.85 (0.49, 1.50)                  | 31                 | 0.96 (0.58, 1.59)                  | 31    | 0.91 (0.51, 1.63)                  |
| Obese                          | 43              | 1.61† (0.94, 2.75)                 | 43    | 1.28 (0.62, 2.62)                  | 28                 | 1.05 (0.62, 1.79)                  | 28    | 0.94 (0.44, 2.01)                  |
| <i>P for trend</i>             |                 | 0.04                               |       | 0.41                               |                    | 0.86                               |       | 0.88                               |

Note: Hazard ratios (HRs) and 95% confidence intervals (CIs) from Cox regression models are presented

<sup>1</sup>Normal =  $\geq 18.5$  to  $< 25$  kg/m<sup>2</sup>; Overweight =  $\geq 25$  to  $< 30$  kg/m<sup>2</sup>; Obese =  $\geq 30$  kg/m<sup>2</sup>

Those with a BMI  $< 18.5$  kg/m<sup>2</sup> were excluded from these analyses

<sup>2</sup>Adjusted for: age (continuous), ethnicity (white/other), marital status (married or living with someone/divorced, separated, or widowed/single, never married), highest level of education (high school or less/some post-high school education/post-high school certificate or degree), total household income (\$0 to \$49,999/\$50,000 to \$99,999/ $\geq$  \$100,000), geographical area of residence (urban/rural), smoking status (current/former/never), alcohol consumption (grams of ethanol per day), energy intake (kilocalories per day), total physical activity (MET-hours per week), history of diabetes (yes/no), family history of cancer (yes/no), pack-years of cigarettes (lung cancer only), fibre intake (grams per day) (colon cancer only), menopausal status (pre-menopause/post-menopause) (endometrial cancers), years of birth control use (0 to 5 years/ $> 5$  years), (breast and endometrial cancers), history of breast cancer screening (yes/no) (breast cancer only), history of colon cancer screening (yes/no) (colon cancer only), and history of prostate cancer screening (yes/no) (prostate cancer only)

<sup>3</sup>Adjusted for: all covariates listed above and waist circumference (below/above guidelines)

\*\*p $< 0.01$ , \*p $< 0.05$ , †p $< 0.1$

Supplementary Table 3. Results from analyses of waist circumference<sup>1</sup> and cancer incidence for cancers occurring greater than two years after baseline data collection (n=26,205)

|                                | MALES (n=9 864) |                                            | FEMALES (n=16 341) |                                            |
|--------------------------------|-----------------|--------------------------------------------|--------------------|--------------------------------------------|
|                                | Cases           | Latency multivariate-adjusted <sup>2</sup> | Cases              | Latency multivariate-adjusted <sup>2</sup> |
| All-cancers                    |                 |                                            |                    |                                            |
| Below                          | 417             | 1.0 (Ref)                                  | 545                | 1.0 (Ref)                                  |
| Above                          | 447             | 1.28** (1.12, 1.47)                        | 600                | 1.20** (1.06, 1.35)                        |
| Prostate cancer                |                 |                                            |                    |                                            |
| Below                          | 176             | 1.0 (Ref)                                  | --                 | --                                         |
| Above                          | 163             | 1.14 (0.91, 1.42)                          | --                 | --                                         |
| Breast cancer – Premenopausal  |                 |                                            |                    |                                            |
| Below                          | --              | --                                         | 109                | 1.0 (Ref)                                  |
| Above                          | --              | --                                         | 61                 | 0.95 (0.69, 1.31)                          |
| Breast cancer – Postmenopausal |                 |                                            |                    |                                            |
| Below                          | --              | --                                         | 110                | 1.0 (Ref)                                  |
| Above                          | --              | --                                         | 131                | 1.11 (0.85, 1.44)                          |
| Endometrial                    |                 |                                            |                    |                                            |
| Below                          | --              | --                                         | 26                 | 1.0 (Ref)                                  |
| Above                          | --              | --                                         | 71                 | 3.21** (2.01, 5.12)                        |
| Colon                          |                 |                                            |                    |                                            |
| Below                          | 25              | 1.0 (Ref)                                  | 40                 | 1.0 (Ref)                                  |
| Above                          | 47              | 2.01** (1.22, 3.32)                        | 51                 | 1.36 (0.88, 2.09)                          |
| Lung                           |                 |                                            |                    |                                            |
| Below                          | 26              | 1.0 (Ref)                                  | 60                 | 1.0 (Ref)                                  |
| Above                          | 36              | 1.23 (0.73, 2.09)                          | 57                 | 0.78 (0.53, 1.14)                          |
| Leukemia                       |                 |                                            |                    |                                            |
| Below                          | 24              | 1.0 (Ref)                                  | 16                 | 1.0 (Ref)                                  |
| Above                          | 23              | 1.35 (0.75, 2.42)                          | 19                 | 1.24 (0.62, 2.47)                          |
| Non-Hodgkin Lymphoma           |                 |                                            |                    |                                            |
| Below                          | 18              | 1.0 (Ref)                                  | 18                 | 1.0 (Ref)                                  |
| Above                          | 30              | 2.10* (1.15, 3.83)                         | 22                 | 1.21 (0.64, 2.31)                          |
| Hematological                  |                 |                                            |                    |                                            |
| Below                          | 44              | 1.0 (Ref)                                  | 35                 | 1.0 (Ref)                                  |
| Above                          | 53              | 1.60* (1.06, 2.42)                         | 43                 | 1.29 (0.82, 2.06)                          |

Note: Hazard ratios (HRs) and 95% confidence intervals (CIs) from Cox regression models are presented

<sup>1</sup>waist circumference below guidelines: <102 cm for men, < 88 cm for women

<sup>1</sup>waist circumference above guidelines: ≥102 cm for men, ≥88 cm for women

<sup>2</sup>Adjusted for: age (continuous), ethnicity (white/other), marital status (married or living with someone/divorced, separated, or widowed/single, never married), highest level of education (high school or less/some post-high school education/post-high school certificate or degree), total household income (\$0 to \$49,999/\$50,000 to \$99,999/≥ \$100,000), geographical area of residence (urban/rural), smoking status (current/former/never), alcohol consumption (grams of ethanol per day), energy intake (kilocalories per day), total physical activity (MET-hours per week), history of diabetes (yes/no), family history of cancer (yes/no), pack-years of cigarettes (lung cancer only), fibre intake (grams per day) (colon cancer only), menopausal status (pre-menopause/post-menopause) (endometrial cancer), years of birth control use (0 to 5 years/>5 years), (breast and endometrial cancers), history of breast cancer screening (yes/no) (breast cancer only), history of colon cancer screening (yes/no) (colon cancer only), and history of prostate cancer screening (yes/no) (prostate cancer only)

\*\*p<0.01, \*p<0.05, †p<0.1

Supplementary Table 4. Results from analyses of waist circumference<sup>1</sup> and cancer incidence adjusting for all covariates and dichotomous BMI (n=25 499)

|                                | MALES (n=9 749) |                                    |       |                                    | FEMALES (n=15 750) |                                    |       |                                    |
|--------------------------------|-----------------|------------------------------------|-------|------------------------------------|--------------------|------------------------------------|-------|------------------------------------|
|                                | Cases           | Multivariate-adjusted <sup>2</sup> | Cases | Multivariate-adjusted <sup>3</sup> | Cases              | Multivariate-adjusted <sup>2</sup> | Cases | Multivariate-adjusted <sup>3</sup> |
| All-cancer                     |                 |                                    |       |                                    |                    |                                    |       |                                    |
| Below                          | 488             | 1.0 (Ref)                          | 485   | 1.0 (Ref)                          | 620                | 1.0 (Ref)                          | 609   | 1.0 (Ref)                          |
| Above                          | 499             | 1.22** (1.07, 1.38)                | 499   | 1.20* (1.04, 1.39)                 | 671                | 1.17** (1.04, 1.31)                | 670   | 1.21** (1.04, 1.40)                |
| Prostate cancer                |                 |                                    |       |                                    |                    |                                    |       |                                    |
| Below                          | 202             | 1.0 (Ref)                          | 201   | 1.0 (Ref)                          | --                 | --                                 | --    | --                                 |
| Above                          | 190             | 1.14 (0.93, 1.39)                  | 190   | 1.10 (0.88, 1.38)                  | --                 | --                                 | --    | --                                 |
| Breast cancer – Premenopausal  |                 |                                    |       |                                    |                    |                                    |       |                                    |
| Below                          | --              | --                                 | --    | --                                 | 121                | 1.0 (Ref)                          | 118   | 1.0 (Ref)                          |
| Above                          | --              | --                                 | --    | --                                 | 64                 | 0.90 (0.66, 1.23)                  | 64    | 1.24 (0.80, 1.90)                  |
| Breast cancer – Postmenopausal |                 |                                    |       |                                    |                    |                                    |       |                                    |
| Below                          | --              | --                                 | --    | --                                 | 120                | 1.0 (Ref)                          | 119   | 1.0 (Ref)                          |
| Above                          | --              | --                                 | --    | --                                 | 154                | 1.18 (0.93, 1.52)                  | 154   | 1.22 (0.89, 1.67)                  |
| Endometrial cancer             |                 |                                    |       |                                    |                    |                                    |       |                                    |
| Below                          | --              | --                                 | --    | --                                 | 30                 | 1.0 (Ref)                          | 30    | 1.0 (Ref)                          |
| Above                          | --              | --                                 | --    | --                                 | 81                 | 3.14** (2.04, 4.85)                | 80    | 2.41** (1.38, 4.22)                |
| Colon cancer                   |                 |                                    |       |                                    |                    |                                    |       |                                    |
| Below                          | 32              | 1.0 (Ref)                          | 32    | 1.0 (Ref)                          | 48                 | 1.0 (Ref)                          | 47    | 1.0 (Ref)                          |
| Above                          | 49              | 1.67* (1.06, 2.65)                 | 49    | 1.44 (0.88, 2.38)                  | 59                 | 1.25 (0.84, 1.86)                  | 59    | 0.93 (0.58, 1.50)                  |
| Lung cancer                    |                 |                                    |       |                                    |                    |                                    |       |                                    |
| Below                          | 30              | 1.0 (Ref)                          | 28    | 1.0 (Ref)                          | 67                 | 1.0 (Ref)                          | 63    | 1.0 (Ref)                          |
| Above                          | 41              | 1.20 (0.73, 1.96)                  | 41    | 1.85† (0.95, 3.58)                 | 62                 | 0.74 (0.51, 1.06)                  | 62    | 0.87 (0.54, 1.40)                  |
| Leukemia                       |                 |                                    |       |                                    |                    |                                    |       |                                    |
| Below                          | 27              | 1.0 (Ref)                          | 27    | 1.0 (Ref)                          | 20                 | 1.0 (Ref)                          | 20    | 1.0 (Ref)                          |
| Above                          | 25              | 1.25 (0.71, 2.18)                  | 25    | 1.34 (0.71, 2.54)                  | 22                 | 1.08 (0.57, 2.03)                  | 22    | 1.58 (0.66, 3.78)                  |
| Non-Hodgkin lymphoma           |                 |                                    |       |                                    |                    |                                    |       |                                    |
| Below                          | 20              | 1.0 (Ref)                          | 20    | 1.0 (Ref)                          | 22                 | 1.0 (Ref)                          | 22    | 1.0 (Ref)                          |
| Above                          | 33              | 2.11** (1.19, 3.75)                | 33    | 2.10* (1.09, 4.04)                 | 23                 | 1.05 (0.57, 1.92)                  | 23    | 0.83 (0.40, 1.73)                  |
| Hematological cancers          |                 |                                    |       |                                    |                    |                                    |       |                                    |
| Below                          | 49              | 1.0 (Ref)                          | 49    | 1.0 (Ref)                          | 43                 | 1.0 (Ref)                          | 43    | 1.0 (Ref)                          |
| Above                          | 58              | 1.56* (1.05, 2.30)                 | 58    | 1.63* (1.04, 2.55)                 | 47                 | 1.12 (0.73, 1.71)                  | 47    | 1.16 (0.67, 2.02)                  |

Note: Hazard ratios (HRs) and 95% confidence intervals (CIs) from Cox regression models are presented

<sup>1</sup>waist circumference below guidelines: <102 cm for men, < 88 cm for women

<sup>1</sup>waist circumference above guidelines: ≥102 cm for men, ≥88 cm for women

<sup>2</sup>Adjusted for: age (continuous), ethnicity (white/other), marital status (married or living with someone/divorced, separated, or widowed/single, never married), highest level of education (high school or less/some post-high school education/post-high school certificate or degree), total household income (\$0 to \$49,999/\$50,000 to \$99,999/≥ \$100,000), geographical area of residence (urban/rural), smoking status (current/former/never), alcohol consumption (grams of ethanol per day), energy intake (kilocalories per day), total physical activity (MET-hours per week), history of diabetes (yes/no), family history of cancer (yes/no), pack-years of cigarettes (lung cancer only), fibre intake (grams per day) (colon cancer only), menopausal status (pre-menopause/post-menopause) (endometrial cancer), years of birth control use (0 to 5 years/>5 years), (breast and endometrial cancers), history of breast cancer screening (yes/no) (breast cancer only), history of colon cancer screening (yes/no) (colon cancer only), and history of prostate cancer screening (yes/no) (prostate cancer only)

<sup>3</sup>Adjusted for: all variables in multivariate-analysis<sup>2</sup> as well as BMI (≥18.5 kg/m<sup>2</sup> and < 25 kg/m<sup>2</sup>/ = ≥ 25 kg/m<sup>2</sup> and < 30 kg/m<sup>2</sup>/ = ≥ 30 kg/m<sup>2</sup>).

\*\*p<0.01, \*p<0.05, †p<0.1

Supplementary Table 5. Results from analyses of waist circumference<sup>1</sup> in quartiles and cancer incidence (n=26 488)

|                                       | MALES (n=9 990) |                    |       |                                    |       |                                    | FEMALES (n=16 498) |                     |       |                                    |       |                                    |
|---------------------------------------|-----------------|--------------------|-------|------------------------------------|-------|------------------------------------|--------------------|---------------------|-------|------------------------------------|-------|------------------------------------|
|                                       | Cases           | Age-adjusted       | Cases | Multivariate-adjusted <sup>2</sup> | Cases | Multivariate-adjusted <sup>3</sup> | Cases              | Age-adjusted        | Cases | Multivariate-adjusted <sup>2</sup> | Cases | Multivariate-adjusted <sup>3</sup> |
| <b>All-cancer</b>                     |                 |                    |       |                                    |       |                                    |                    |                     |       |                                    |       |                                    |
| 1 <sup>st</sup> Quartile              | 30              | 1.0 (Ref)          | 28    | 1.0 (Ref)                          | 26    | 1.0 (Ref)                          | 425                | 1.0 (Ref)           | 408   | 1.0 (Ref)                          | 398   | 1.0 (Ref)                          |
| 2 <sup>nd</sup> Quartile              | 155             | 0.83 (0.56, 1.23)  | 152   | 0.86 (0.58, 1.29)                  | 152   | 0.90 (0.59, 1.37)                  | 361                | 1.08 (0.94, 1.24)   | 346   | 1.07 (0.93, 1.24)                  | 345   | 1.11 (0.94, 1.32)                  |
| 3 <sup>rd</sup> Quartile              | 342             | 0.92 (0.64, 1.34)  | 336   | 0.95 (0.64, 1.40)                  | 335   | 0.97 (0.63, 1.50)                  | 276                | 1.12 (0.96, 1.30)   | 262   | 1.09 (0.93, 1.27)                  | 262   | 1.09 (0.88, 1.36)                  |
| 4 <sup>th</sup> Quartile              | 476             | 1.11 (0.77, 1.61)  | 465   | 1.12 (0.76, 1.66)                  | 465   | 1.08 (0.68, 1.50)                  | 282                | 1.37** (1.17, 1.59) | 273   | 1.34** (1.14, 1.58)                | 272   | 1.26† (0.97, 1.64)                 |
| <i>P for trend</i>                    |                 | <0.01              |       | <0.01                              |       | 0.20                               |                    | <0.01               |       | <0.01                              |       | 0.11                               |
| <b>Prostate cancer</b>                |                 |                    |       |                                    |       |                                    |                    |                     |       |                                    |       |                                    |
| 1 <sup>st</sup> Quartile              | 12              | 1.0 (Ref)          | 11    | 1.0 (Ref)                          | 10    | 1.0 (Ref)                          | --                 | --                  | --    | --                                 | --    | --                                 |
| 2 <sup>nd</sup> Quartile              | 66              | 0.86 (0.46, 1.59)  | 66    | 0.91 (0.48, 1.73)                  | 66    | 0.94 (0.48, 1.84)                  | --                 | --                  | --    | --                                 | --    | --                                 |
| 3 <sup>rd</sup> Quartile              | 142             | 0.92 (0.51, 1.67)  | 139   | 0.93 (0.50, 1.72)                  | 139   | 0.89 (0.44, 1.78)                  | --                 | --                  | --    | --                                 | --    | --                                 |
| 4 <sup>th</sup> Quartile              | 178             | 0.99 (0.55, 1.78)  | 174   | 1.02 (0.55, 1.90)                  | 174   | 1.00 (0.48, 2.07)                  | --                 | --                  | --    | --                                 | --    | --                                 |
| <i>P for trend</i>                    |                 | 0.42               |       | 0.44                               |       | 0.72                               | --                 | --                  | --    | --                                 | --    | --                                 |
| <b>Breast cancer – Premenopausal</b>  |                 |                    |       |                                    |       |                                    |                    |                     |       |                                    |       |                                    |
| 1 <sup>st</sup> Quartile              | --              | --                 | --    | --                                 | --    | --                                 | 94                 | 1.0 (Ref)           | 91    | 1.0 (Ref)                          | 88    | 1.0 (Ref)                          |
| 2 <sup>nd</sup> Quartile              | --              | --                 | --    | --                                 | --    | --                                 | 47                 | 0.89 (0.63, 1.27)   | 45    | 0.87 (0.61, 1.25)                  | 45    | 1.17 (0.76, 1.79)                  |
| 3 <sup>rd</sup> Quartile              | --              | --                 | --    | --                                 | --    | --                                 | 30                 | 0.97 (0.64, 1.46)   | 27    | 0.89 (0.58, 1.37)                  | 27    | 1.54 (0.84, 2.80)                  |
| 4 <sup>th</sup> Quartile              | --              | --                 | --    | --                                 | --    | --                                 | 23                 | 0.95 (0.60, 1.50)   | 22    | 0.89 (0.55, 1.44)                  | 22    | 1.82 (0.82, 4.01)                  |
| <i>P for trend</i>                    | --              | --                 | --    | --                                 | --    | --                                 |                    | 0.78                |       | 0.51                               |       | 0.11                               |
| <b>Breast cancer – Postmenopausal</b> |                 |                    |       |                                    |       |                                    |                    |                     |       |                                    |       |                                    |
| 1 <sup>st</sup> Quartile              | --              | --                 | --    | --                                 | --    | --                                 | 79                 | 1.0 (Ref)           | 74    | 1.0 (Ref)                          | 73    | 1.0 (Ref)                          |
| 2 <sup>nd</sup> Quartile              | --              | --                 | --    | --                                 | --    | --                                 | 83                 | 1.11 (0.82, 1.52)   | 82    | 1.19 (0.87, 1.63)                  | 82    | 1.18 (0.82, 1.72)                  |
| 3 <sup>rd</sup> Quartile              | --              | --                 | --    | --                                 | --    | --                                 | 63                 | 1.06 (0.76, 1.48)   | 60    | 1.11 (0.78, 1.56)                  | 60    | 0.92 (0.57, 1.50)                  |
| 4 <sup>th</sup> Quartile              | --              | --                 | --    | --                                 | --    | --                                 | 61                 | 1.20 (0.86, 1.67)   | 58    | 1.24 (0.87, 1.78)                  | 58    | 0.88 (0.50, 1.53)                  |
| <i>P for trend</i>                    | --              | --                 | --    | --                                 | --    | --                                 |                    | 0.37                |       | 0.31                               |       | 0.54                               |
| <b>Endometrial cancer</b>             |                 |                    |       |                                    |       |                                    |                    |                     |       |                                    |       |                                    |
| 1 <sup>st</sup> Quartile              | --              | --                 | --    | --                                 | --    | --                                 | 23                 | 1.0 (Ref)           | 23    | 1.0 (Ref)                          | 23    | 1.0 (Ref)                          |
| 2 <sup>nd</sup> Quartile              | --              | --                 | --    | --                                 | --    | --                                 | 19                 | 1.12 (0.61, 2.07)   | 15    | 0.94 (0.49, 1.81)                  | 15    | 0.63 (0.29, 1.38)                  |
| 3 <sup>rd</sup> Quartile              | --              | --                 | --    | --                                 | --    | --                                 | 32                 | 2.66** (1.55, 4.57) | 27    | 2.34** (1.32, 4.13)                | 27    | 1.06 (0.45, 2.48)                  |
| 4 <sup>th</sup> Quartile              | --              | --                 | --    | --                                 | --    | --                                 | 47                 | 4.68** (2.82, 7.76) | 45    | 4.48** (2.63, 7.63)                | 44    | 1.53 (0.61, 3.85)                  |
| <i>P for trend</i>                    | --              | --                 | --    | --                                 | --    | --                                 |                    | <0.01               |       | <0.01                              |       | 0.11                               |
| <b>Colon cancer</b>                   |                 |                    |       |                                    |       |                                    |                    |                     |       |                                    |       |                                    |
| 1 <sup>st</sup> Quartile              | 1               | 1.0 (Ref)          | 1     | 1.0 (Ref)                          | 1     | 1.0 (Ref)                          | 29                 | 1.0 (Ref)           | 28    | 1.0 (Ref)                          | 28    | 1.0 (Ref)                          |
| 2 <sup>nd</sup> Quartile              | 5               | 0.80 (0.09, 6.86)  | 5     | 0.74 (0.09, 6.38)                  | 5     | 0.70 (0.08, 6.06)                  | 29                 | 1.23 (0.73, 2.07)   | 29    | 1.26 (0.75, 2.13)                  | 28    | 0.89 (0.48, 1.66)                  |
| 3 <sup>rd</sup> Quartile              | 29              | 2.33 (0.32, 17.20) | 29    | 2.03 (0.27, 15.07)                 | 29    | 1.79 (0.22, 14.62)                 | 26                 | 1.46 (0.86, 2.50)   | 26    | 1.47 (0.85, 2.54)                  | 26    | 1.13 (0.55, 2.32)                  |
| 4 <sup>th</sup> Quartile              | 45              | 3.13 (0.43, 22.82) | 44    | 2.47 (0.33, 18.23)                 | 44    | 1.77 (0.20, 15.46)                 | 24                 | 1.63† (0.94, 2.81)  | 24    | 1.61 (0.90, 2.86)                  | 24    | 1.49 (0.63, 3.55)                  |
| <i>P for trend</i>                    |                 | <0.01              |       | 0.01                               |       | 0.25                               |                    | 0.06                |       | 0.08                               |       | 0.33                               |



|                          |    |                                |    |                   |    |                   |    |                   |    |                                |    |                    |
|--------------------------|----|--------------------------------|----|-------------------|----|-------------------|----|-------------------|----|--------------------------------|----|--------------------|
| Lung cancer              |    |                                |    |                   |    |                   |    |                   |    |                                |    |                    |
| 1 <sup>st</sup> Quartile | 3  | 1.0 (Ref)                      | 3  | 1.0 (Ref)         | 2  | 1.0 (Ref)         | 46 | 1.0 (Ref)         | 43 | 1.0 (Ref)                      | 39 | 1.0 (Ref)          |
| 2 <sup>nd</sup> Quartile | 13 | 0.62 (0.17, 2.17)              | 12 | 0.57 (0.16, 2.06) | 12 | 0.90 (0.20, 4.09) | 42 | 0.99 (0.65, 1.51) | 40 | 0.97 (0.63, 1.50)              | 40 | 1.11 (0.66, 1.87)  |
| 3 <sup>rd</sup> Quartile | 18 | 0.41 (0.12, 1.39)              | 17 | 0.39 (0.11, 1.36) | 16 | 0.77 (0.16, 3.68) | 28 | 0.81 (0.50, 1.30) | 27 | 0.73 (0.44, 1.19)              | 27 | 0.92 (0.46, 1.83)  |
| 4 <sup>th</sup> Quartile | 39 | 0.73 (0.22, 2.39)              | 38 | 0.55 (0.16, 1.85) | 38 | 1.66 (0.32, 8.72) | 20 | 0.70 (0.41, 1.19) | 19 | 0.57 <sup>†</sup> (0.32, 1.01) | 19 | 0.76 (0.32, 1.82)  |
| <i>P for trend</i>       |    | 0.54                           |    | 0.80              |    | 0.17              |    | 0.14              |    | 0.04                           |    | 0.57               |
| Leukemia                 |    |                                |    |                   |    |                   |    |                   |    |                                |    |                    |
| 1 <sup>st</sup> Quartile | 0  | --                             | 0  | --                | 0  | --                | 13 | 1.0 (Ref)         | 13 | 1.0 (Ref)                      | 13 | 1.0 (Ref)          |
| 2 <sup>nd</sup> Quartile | 12 | 1.0 (Ref)                      | 12 | 1.0 (Ref)         | 12 | 1.0 (Ref)         | 13 | 1.26 (0.58, 2.73) | 12 | 1.12 (0.51, 2.47)              | 12 | 1.56 (0.63, 3.85)  |
| 3 <sup>rd</sup> Quartile | 16 | 0.71 (0.33, 1.50)              | 16 | 0.72 (0.34, 1.53) | 16 | 0.81 (0.34, 1.93) | 7  | 0.91 (0.36, 2.30) | 7  | 0.83 (0.32, 2.12)              | 7  | 1.70 (0.51, 5.69)  |
| 4 <sup>th</sup> Quartile | 26 | 1.03 (0.52, 2.06)              | 24 | 1.00 (0.49, 2.05) | 24 | 1.09 (0.39, 3.08) | 11 | 1.71 (0.76, 3.86) | 10 | 1.33 (0.56, 3.20)              | 10 | 3.83 (0.92, 15.89) |
| <i>P for trend</i>       |    | 0.34                           |    | 0.40              |    | 0.40              |    | 0.33              |    | 0.70                           |    | 0.09               |
| Non-Hodgkin lymphoma     |    |                                |    |                   |    |                   |    |                   |    |                                |    |                    |
| 1 <sup>st</sup> Quartile | 0  | --                             | 0  | --                | 0  | --                | 16 | 1.0 (Ref)         | 15 | 1.0 (Ref)                      | 15 | 1.0 (Ref)          |
| 2 <sup>nd</sup> Quartile | 8  | 1.0 (Ref)                      | 8  | 1.0 (Ref)         | 8  | 1.0 (Ref)         | 10 | 0.76 (0.34, 1.68) | 9  | 0.70 (0.30, 1.60)              | 9  | 0.53 (0.20, 1.40)  |
| 3 <sup>rd</sup> Quartile | 13 | 0.88 (0.36, 2.12)              | 13 | 0.88 (0.36, 2.13) | 13 | 0.89 (0.32, 2.51) | 9  | 0.90 (0.39, 2.05) | 9  | 0.90 (0.39, 2.10)              | 9  | 0.65 (0.21, 2.01)  |
| 4 <sup>th</sup> Quartile | 32 | 1.96 <sup>†</sup> (0.90, 4.28) | 32 | 1.89 (0.85, 4.19) | 32 | 1.37 (0.43, 4.39) | 11 | 1.32 (0.60, 2.86) | 11 | 1.31 (0.58, 2.98)              | 11 | 0.95 (0.25, 3.59)  |
| <i>P for trend</i>       |    | <0.01                          |    | 0.01              |    | 0.25              |    | 0.53              |    | 0.53                           |    | 0.95               |
| Hematological cancers    |    |                                |    |                   |    |                   |    |                   |    |                                |    |                    |
| 1 <sup>st</sup> Quartile | 0  | --                             | 0  | --                | 0  | --                | 30 | 1.0 (Ref)         | 29 | 1.0 (Ref)                      | 29 | 1.0 (Ref)          |
| 2 <sup>nd</sup> Quartile | 21 | 1.0 (Ref)                      | 21 | 1.0 (Ref)         | 21 | 1.0 (Ref)         | 24 | 0.99 (0.58, 1.71) | 22 | 0.92 (0.52, 1.60)              | 22 | 0.95 (0.50, 1.84)  |
| 3 <sup>rd</sup> Quartile | 30 | 0.77 (0.44, 1.34)              | 30 | 0.77 (0.44, 1.35) | 30 | 0.84 (0.44, 1.61) | 16 | 0.88 (0.48, 1.63) | 16 | 0.87 (0.46, 1.61)              | 16 | 1.03 (0.45, 2.35)  |
| 4 <sup>th</sup> Quartile | 58 | 1.34 (0.81, 2.22)              | 56 | 1.30 (0.77, 2.18) | 56 | 1.18 (0.55, 2.52) | 23 | 1.52 (0.88, 2.64) | 22 | 1.40 (0.78, 2.52)              | 22 | 1.93 (0.74, 5.08)  |
| <i>P for trend</i>       |    | 0.02                           |    | 0.03              |    | 0.18              |    | 0.24              |    | 0.38                           |    | 0.23               |

Note: Hazard ratios (HRs) and 95% confidence intervals (CIs) from Cox regression models are presented

<sup>1</sup>waist circumference quartile 1: 67.9 cm – 81.9 cm (males), 55.9 cm – 81.9 cm (females)

<sup>1</sup>waist circumference quartile 2: 82.0 cm – 91.8 cm (males), 82.0 cm – 91.8 cm (females)

<sup>1</sup>waist circumference quartile 3: 91.9 cm – 102.9 cm (males), 91.9 cm – 102.9 cm (females)

<sup>1</sup>waist circumference quartile 4: 103.0 cm – 149.9 cm (males), 103.0 cm – 149.9 cm (females)

<sup>2</sup>Adjusted for: age (continuous), sex (for non sex-specific cancers), ethnicity (white/other), marital status (married or living with someone/divorced, separated, or widowed/single, never married), highest level of education (high school or less/some post-high school education/post-high school certificate or degree), total household income (\$0 to \$49,999/\$50,000 to \$99,999/≥ \$100,000), geographical area of residence (urban/rural), smoking status (current/former/never), alcohol consumption (grams of ethanol per day), energy intake (kilocalories per day), total physical activity (MET-hours per week), history of diabetes (yes/no), family history of cancer (yes/no), pack-years of cigarettes (lung cancer only), fibre intake (grams per day) (colon cancer only), menopausal status (pre-menopause/post-menopause) (breast cancer), years of birth control use (0 to 5 years/>5 years), (breast and endometrial cancers), history of breast cancer screening (yes/no) (breast cancer only), history of colon cancer screening (yes/no) (colon cancer only), and history of prostate cancer screening (yes/no) (prostate cancer only).

<sup>3</sup>Adjusted for: all variables in multivariate-analysis<sup>2</sup> as well as BMI (≥18.5 kg/m<sup>2</sup> and < 25 kg/m<sup>2</sup>/ = ≥ 25 kg/m<sup>2</sup> and < 30 kg/m<sup>2</sup>/ = ≥ 30 kg/m<sup>2</sup>).

\*\*p<0.01, \*p<0.05, †p<0.1

Supplementary Table 6. Results from analyses of waist-to-hip ratio in quartiles<sup>1</sup> and cancer incidence for cancers occurring greater than two years after baseline data collection (n = 26060)

|                                | MALES (n=9 764) |                                            |       |                                            | FEMALES (n=16 296) |                                            |       |                                            |
|--------------------------------|-----------------|--------------------------------------------|-------|--------------------------------------------|--------------------|--------------------------------------------|-------|--------------------------------------------|
|                                | Cases           | Latency Multivariate-adjusted <sup>2</sup> | Cases | Latency Multivariate-adjusted <sup>3</sup> | Cases              | Latency Multivariate-adjusted <sup>2</sup> | Cases | Latency Multivariate-adjusted <sup>3</sup> |
| All-cancer                     |                 |                                            |       |                                            |                    |                                            |       |                                            |
| 1 <sup>st</sup> Quartile       | 143             | 1.0 (Ref)                                  | 141   | 1.0 (Ref)                                  | 220                | 1.0 (Ref)                                  | 217   | 1.0 (Ref)                                  |
| 2 <sup>nd</sup> Quartile       | 187             | 1.09 (0.87, 1.35)                          | 186   | 1.07 (0.85, 1.34)                          | 278                | 1.17† (0.98, 1.40)                         | 275   | 1.15 (0.96, 1.37)                          |
| 3 <sup>rd</sup> Quartile       | 237             | 1.20† (0.98, 1.49)                         | 237   | 1.15 (0.91, 1.44)                          | 300                | 1.21* (1.02, 1.45)                         | 297   | 1.15 (0.96, 1.38)                          |
| 4 <sup>th</sup> Quartile       | 290             | 1.39** (1.13, 1.71)                        | 290   | 1.27* (1.00, 1.60)                         | 343                | 1.24* (1.03, 1.47)                         | 343   | 1.13 (0.94, 1.37)                          |
| <i>P for trend</i>             |                 | <0.01                                      |       | 0.03                                       |                    | 0.02                                       |       | 0.27                                       |
| Prostate cancer                |                 |                                            |       |                                            |                    |                                            |       |                                            |
| 1 <sup>st</sup> Quartile       | 60              | 1.0 (Ref)                                  | 59    | 1.0 (Ref)                                  | --                 | --                                         | --    | --                                         |
| 2 <sup>nd</sup> Quartile       | 69              | 0.96 (0.68, 1.36)                          | 69    | 0.97 (0.68, 1.38)                          | --                 | --                                         | --    | --                                         |
| 3 <sup>rd</sup> Quartile       | 89              | 1.09 (0.78, 1.52)                          | 89    | 1.10 (0.77, 1.57)                          | --                 | --                                         | --    | --                                         |
| 4 <sup>th</sup> Quartile       | 120             | 1.46* (1.06, 2.02)                         | 120   | 1.49 (1.04, 2.14)                          | --                 | --                                         | --    | --                                         |
| <i>P for trend</i>             |                 | 0.01                                       |       | 0.01                                       |                    | --                                         |       | --                                         |
| Breast cancer – Premenopausal  |                 |                                            |       |                                            |                    |                                            |       |                                            |
| 1 <sup>st</sup> Quartile       | --              | --                                         | --    | --                                         | 45                 | 1.0 (Ref)                                  | 44    | 1.0 (Ref)                                  |
| 2 <sup>nd</sup> Quartile       | --              | --                                         | --    | --                                         | 49                 | 1.23 (0.82, 1.85)                          | 48    | 1.28 (0.84, 1.93)                          |
| 3 <sup>rd</sup> Quartile       | --              | --                                         | --    | --                                         | 48                 | 1.35 (0.89, 2.03)                          | 47    | 1.47† (0.96, 2.27)                         |
| 4 <sup>th</sup> Quartile       | --              | --                                         | --    | --                                         | 28                 | 0.93 (0.57, 1.50)                          | 28    | 1.09 (0.64, 1.85)                          |
| <i>P for trend</i>             |                 | --                                         |       | --                                         |                    | 0.91                                       |       | 0.42                                       |
| Breast cancer – Postmenopausal |                 |                                            |       |                                            |                    |                                            |       |                                            |
| 1 <sup>st</sup> Quartile       | --              | --                                         | --    | --                                         | 42                 | 1.0 (Ref)                                  | 42    | 1.0 (Ref)                                  |
| 2 <sup>nd</sup> Quartile       | --              | --                                         | --    | --                                         | 68                 | 1.38 (0.94, 2.02)                          | 67    | 1.33 (0.90, 1.97)                          |
| 3 <sup>rd</sup> Quartile       | --              | --                                         | --    | --                                         | 55                 | 1.00 (0.67, 1.50)                          | 55    | 0.95 (0.63, 1.44)                          |
| 4 <sup>th</sup> Quartile       | --              | --                                         | --    | --                                         | 76                 | 1.13 (0.79, 1.72)                          | 76    | 1.05 (0.69, 1.59)                          |
| <i>P for trend</i>             |                 | --                                         |       | --                                         |                    | 0.94                                       |       | 0.67                                       |
| Endometrial cancer             |                 |                                            |       |                                            |                    |                                            |       |                                            |
| 1 <sup>st</sup> Quartile       | --              | --                                         | --    | --                                         | 14                 | 1.0 (Ref)                                  | 14    | 1.0 (Ref)                                  |
| 2 <sup>nd</sup> Quartile       | --              | --                                         | --    | --                                         | 17                 | 1.21 (0.60, 2.47)                          | 17    | 0.97 (0.48, 1.99)                          |
| 3 <sup>rd</sup> Quartile       | --              | --                                         | --    | --                                         | 31                 | 2.24* (1.18, 4.24)                         | 30    | 1.37 (0.70, 2.67)                          |
| 4 <sup>th</sup> Quartile       | --              | --                                         | --    | --                                         | 34                 | 2.22* (1.16, 4.23)                         | 34    | 1.10 (0.55, 2.20)                          |
| <i>P for trend</i>             |                 | --                                         |       | --                                         |                    | <0.01                                      |       | 0.65                                       |
| Colon cancer                   |                 |                                            |       |                                            |                    |                                            |       |                                            |
| 1 <sup>st</sup> Quartile       | 9               | 1.0 (Ref)                                  | 9     | 1.0 (Ref)                                  | 17                 | 1.0 (Ref)                                  | 17    | 1.0 (Ref)                                  |
| 2 <sup>nd</sup> Quartile       | 12              | 1.05 (0.44, 2.50)                          | 12    | 0.89 (0.37, 2.15)                          | 24                 | 1.29 (0.69, 2.41)                          | 24    | 1.14 (0.61, 2.13)                          |
| 3 <sup>rd</sup> Quartile       | 22              | 1.60 (0.73, 3.50)                          | 22    | 1.16 (0.51, 2.67)                          | 23                 | 1.18 (0.63, 2.23)                          | 22    | 0.92 (0.47, 1.77)                          |
| 4 <sup>th</sup> Quartile       | 29              | 1.90 (0.88, 4.11)                          | 29    | 1.22 (0.53, 2.84)                          | 26                 | 1.17 (0.62, 2.21)                          | 26    | 0.90 (0.46, 1.76)                          |
| <i>P for trend</i>             |                 | 0.04                                       |       | 0.45                                       |                    | 0.75                                       |       | 0.58                                       |
| Lung cancer                    |                 |                                            |       |                                            |                    |                                            |       |                                            |
| 1 <sup>st</sup> Quartile       | 8               | 1.0 (Ref)                                  | 7     | 1.0 (Ref)                                  | 17                 | 1.0 (Ref)                                  | 15    | 1.0 (Ref)                                  |
| 2 <sup>nd</sup> Quartile       | 15              | 1.56 (0.66, 3.70)                          | 14    | 1.88 (0.74, 4.77)                          | 28                 | 1.18 (0.64, 2.17)                          | 28    | 1.38 (0.73, 2.61)                          |
| 3 <sup>rd</sup> Quartile       | 15              | 1.14 (0.48, 2.70)                          | 15    | 1.58 (0.60, 4.15)                          | 31                 | 1.03 (0.56, 1.87)                          | 31    | 1.24 (0.66, 2.35)                          |
| 4 <sup>th</sup> Quartile       | 24              | 1.15 (0.50, 2.65)                          | 24    | 1.68 (0.63, 4.44)                          | 40                 | 0.90 (0.49, 1.62)                          | 40    | 1.15 (0.60, 2.22)                          |
| <i>P for trend</i>             |                 | 0.92                                       |       | 0.49                                       |                    | 0.48                                       |       | 0.94                                       |
| Leukemia                       |                 |                                            |       |                                            |                    |                                            |       |                                            |
| 1 <sup>st</sup> Quartile       | 10              | 1.0 (Ref)                                  | 10    | 1.0 (Ref)                                  | 4                  | 1.0 (Ref)                                  | 4     | 1.0 (Ref)                                  |
| 2 <sup>nd</sup> Quartile       | 10              | 0.89 (0.37, 2.16)                          | 10    | 0.91 (0.37, 2.23)                          | 7                  | 1.70 (0.50, 5.84)                          | 7     | 1.81 (0.53, 6.25)                          |
| 3 <sup>rd</sup> Quartile       | 15              | 1.26 (0.56, 2.84)                          | 15    | 1.28 (0.53, 3.07)                          | 11                 | 2.60 (0.82, 8.23)                          | 11    | 3.05† (0.94, 9.89)                         |
| 4 <sup>th</sup> Quartile       | 10              | 0.84 (0.34, 2.08)                          | 10    | 0.83 (0.30, 2.28)                          | 13                 | 2.84† (0.90, 8.92)                         | 13    | 3.76* (1.12, 12.61)                        |
| <i>P for trend</i>             |                 | 0.93                                       |       | 0.91                                       |                    | 0.05                                       |       | 0.02                                       |
| Non-Hodgkin lymphoma           |                 |                                            |       |                                            |                    |                                            |       |                                            |
| 1 <sup>st</sup> Quartile       | 3               | 1.0 (Ref)                                  | 3     | 1.0 (Ref)                                  | 8                  | 1.0 (Ref)                                  | 8     | 1.0 (Ref)                                  |
| 2 <sup>nd</sup> Quartile       | 17              | 5.00* (1.46, 17.14)                        | 17    | 4.52* (1.29, 15.78)                        | 9                  | 1.02 (0.39, 2.67)                          | 9     | 0.92 (0.35, 2.43)                          |
| 3 <sup>rd</sup> Quartile       | 14              | 3.71* (1.05, 13.03)                        | 14    | 2.84 (0.77, 10.53)                         | 9                  | 0.96 (0.37, 2.50)                          | 9     | 0.79 (0.29, 2.12)                          |
| 4 <sup>th</sup> Quartile       | 14              | 3.42† (0.96, 12.16)                        | 14    | 2.17 (0.57, 8.35)                          | 14                 | 1.29 (0.52, 3.17)                          | 14    | 0.97 (0.37, 2.55)                          |
| <i>P for trend</i>             |                 | 0.27                                       |       | 0.92                                       |                    | 0.59                                       |       | 0.93                                       |

| Hematological cancers    |    |                                |    |                   |    |                                |    |                   |
|--------------------------|----|--------------------------------|----|-------------------|----|--------------------------------|----|-------------------|
| 1 <sup>st</sup> Quartile | 14 | 1.0 (Ref)                      | 14 | 1.0 (Ref)         | 13 | 1.0 (Ref)                      | 13 | 1.0 (Ref)         |
| 2 <sup>nd</sup> Quartile | 27 | 1.72 (0.90, 3.30)              | 27 | 1.67 (0.86, 3.24) | 17 | 1.26 (0.61, 2.60)              | 17 | 1.23 (0.59, 2.55) |
| 3 <sup>rd</sup> Quartile | 30 | 1.76 <sup>†</sup> (0.93, 3.36) | 30 | 1.59 (0.80, 3.17) | 20 | 1.41 (0.70, 2.85)              | 20 | 1.36 (0.66, 2.82) |
| 4 <sup>th</sup> Quartile | 24 | 1.37 (0.70, 2.70)              | 24 | 1.11 (0.52, 2.34) | 28 | 1.80 <sup>†</sup> (0.91, 3.54) | 28 | 1.73 (0.84, 3.59) |
| <i>P for trend</i>       |    | 0.49                           |    | 0.92              |    | 0.08                           |    | 0.13              |

Note: Hazard ratios (HRs) and 95% confidence intervals (CIs) from Cox regression models are presented

<sup>1</sup> Quartiles of WHR for males: 1<sup>st</sup> Quartile = 0.74 - 0.92, 2<sup>nd</sup> Quartile = 0.93 - 0.97, 3<sup>rd</sup> Quartile = 0.97 - 1.02, 4<sup>th</sup> quartile = 1.02 - 1.50

Quartiles of WHR for females: 1<sup>st</sup> Quartile = 0.57 - 0.78, 2<sup>nd</sup> Quartile = 0.78 - 0.82, 3<sup>rd</sup> Quartile = 0.82 - 0.87, 4<sup>th</sup> Quartile = 0.87 - 1.46

<sup>2</sup>Adjusted for: age (continuous), ethnicity (white/other), marital status (married or living with someone/divorced, separated, or widowed/single, never married), highest level of education (high school or less/some post-high school education/post-high school certificate or degree), total household income (\$0 to \$49,999/\$50,000 to \$99,999/≥ \$100,000), geographical area of residence (urban/rural), smoking status (current/former/never), alcohol consumption (grams of ethanol per day), energy intake (kilocalories per day), total physical activity (MET-hours per week), history of diabetes (yes/no), family history of cancer (yes/no), pack-years of cigarettes (lung cancer only), fibre intake (grams per day) (colon cancer only), menopausal status (pre-menopause/post-menopause) (breast and endometrial cancers), years of birth control use (0 to 5 years/>5 years), (breast and endometrial cancers), history of breast cancer screening (yes/no) (breast cancer only), history of colon cancer screening (yes/no) (colon cancer only), and history of prostate cancer screening (yes/no) (prostate cancer only)

<sup>3</sup>Adjusted for: all variables in multivariate-analysis<sup>2</sup> as well as BMI (≥18.5 kg/m<sup>2</sup> and < 25 kg/m<sup>2</sup>/ = ≥ 25 kg/m<sup>2</sup> and < 30 kg/m<sup>2</sup>/ = ≥ 30 kg/m<sup>2</sup>).

\*\*p<0.01, \*p<0.05, †p<0.1

Supplementary Table 7. Results from analyses of waist-to-height-ratio in quartiles<sup>1</sup> and cancer incidence (n=26 478)

|                                | MALES (n=9 981) |                   |       |                                    |       |                                    | FEMALES (n=16 497) |                     |       |                                    |       |                                    |
|--------------------------------|-----------------|-------------------|-------|------------------------------------|-------|------------------------------------|--------------------|---------------------|-------|------------------------------------|-------|------------------------------------|
|                                | Cases           | Age-adjusted      | Cases | Multivariate-adjusted <sup>2</sup> | Cases | Multivariate-adjusted <sup>3</sup> | Cases              | Age-adjusted        | Cases | Multivariate-adjusted <sup>2</sup> | Cases | Multivariate-adjusted <sup>3</sup> |
| All-cancer                     |                 |                   |       |                                    |       |                                    |                    |                     |       |                                    |       |                                    |
| 1 <sup>st</sup> Quartile       | 81              | 1.0 (Ref)         | 79    | 1.0 (Ref)                          | 77    | 1.0 (Ref)                          | 345                | 1.0 (Ref)           | 333   | 1.0 (Ref)                          | 323   | 1.0 (Ref)                          |
| 2 <sup>nd</sup> Quartile       | 206             | 0.90 (0.70, 1.17) | 202   | 0.91 (0.71, 1.18)                  | 202   | 0.91 (0.69, 1.21)                  | 317                | 1.10 (0.94, 1.28)   | 301   | 1.08 (0.93, 1.27)                  | 300   | 1.14 (0.95, 1.37)                  |
| 3 <sup>rd</sup> Quartile       | 349             | 1.04 (0.81, 1.33) | 341   | 1.05 (0.82, 1.34)                  | 341   | 1.02 (0.75, 1.39)                  | 274                | 1.07 (0.91, 1.26)   | 262   | 1.06 (0.90, 1.25)                  | 262   | 1.13 (0.91, 1.42)                  |
| 4 <sup>th</sup> Quartile       | 372             | 1.23 (0.96, 1.57) | 364   | 1.23 (0.95, 1.57)                  | 364   | 1.12 (0.79, 1.57)                  | 410                | 1.34** (1.16, 1.55) | 395   | 1.31** (1.25, 1.53)                | 394   | 1.31† (1.01, 1.70)                 |
| <i>P for trend</i>             |                 | <0.01             |       | <0.01                              |       | 0.23                               |                    | <0.01               |       | <0.01                              |       | 0.06                               |
| Prostate cancer                |                 |                   |       |                                    |       |                                    |                    |                     |       |                                    |       |                                    |
| 1 <sup>st</sup> Quartile       | 30              | 1.0 (Ref)         | 29    | 1.0 (Ref)                          | 28    | 1.0 (Ref)                          | --                 | --                  | --    | --                                 | --    | --                                 |
| 2 <sup>nd</sup> Quartile       | 81              | 0.94 (0.61, 1.42) | 81    | 0.95 (0.62, 1.45)                  | 81    | 0.96 (0.87, 1.52)                  | --                 | --                  | --    | --                                 | --    | --                                 |
| 3 <sup>rd</sup> Quartile       | 157             | 1.22 (0.82, 1.81) | 153   | 1.20 (0.80, 1.79)                  | 153   | 1.22 (0.74, 2.00)                  | --                 | --                  | --    | --                                 | --    | --                                 |
| 4 <sup>th</sup> Quartile       | 132             | 1.12 (0.75, 1.68) | 129   | 1.16 (0.77, 1.75)                  | 129   | 1.22 (0.70, 2.12)                  | --                 | --                  | --    | --                                 | --    | --                                 |
| <i>P for trend</i>             |                 | 0.23              |       | 0.18                               |       | 0.27                               | --                 | --                  | --    | --                                 | --    | --                                 |
| Breast cancer – Premenopausal  |                 |                   |       |                                    |       |                                    |                    |                     |       |                                    |       |                                    |
| 1 <sup>st</sup> Quartile       | --              | --                | --    | --                                 | --    | --                                 | 85                 | 1.0 (Ref)           | 82    | 1.0 (Ref)                          | 79    | 1.0 (Ref)                          |
| 2 <sup>nd</sup> Quartile       | --              | --                | --    | --                                 | --    | --                                 | 45                 | 0.91 (0.63, 1.31)   | 44    | 0.90 (0.63, 1.31)                  | 44    | 1.16 (0.76, 1.77)                  |
| 3 <sup>rd</sup> Quartile       | --              | --                | --    | --                                 | --    | --                                 | 31                 | 0.88 (0.58, 1.34)   | 28    | 0.82 (0.53, 1.26)                  | 28    | 1.33 (0.74, 2.39)                  |
| 4 <sup>th</sup> Quartile       | --              | --                | --    | --                                 | --    | --                                 | 33                 | 0.92 (0.61, 1.38)   | 31    | 0.85 (0.55, 1.31)                  | 31    | 1.68 (0.79, 3.57)                  |
| <i>P for trend</i>             | --              | --                | --    | --                                 | --    | --                                 |                    | 0.59                |       | 0.35                               |       | 0.18                               |
| Breast cancer – Postmenopausal |                 |                   |       |                                    |       |                                    |                    |                     |       |                                    |       |                                    |
| 1 <sup>st</sup> Quartile       | --              | --                | --    | --                                 | --    | --                                 | 56                 | 1.0 (Ref)           | 52    | 1.0 (Ref)                          | 51    | 1.0 (Ref)                          |
| 2 <sup>nd</sup> Quartile       | --              | --                | --    | --                                 | --    | --                                 | 73                 | 1.25 (0.88, 1.77)   | 72    | 1.35 (0.94, 1.93)                  | 72    | 1.45† (0.97, 2.16)                 |
| 3 <sup>rd</sup> Quartile       | --              | --                | --    | --                                 | --    | --                                 | 66                 | 1.72 (0.82, 1.68)   | 62    | 1.24 (0.85, 1.79)                  | 62    | 1.28 (0.79, 2.10)                  |
| 4 <sup>th</sup> Quartile       | --              | --                | --    | --                                 | --    | --                                 | 91                 | 1.29 (0.92, 1.80)   | 88    | 1.40 (0.97, 2.00)                  | 88    | 1.20 (0.68, 2.12)                  |
| <i>P for trend</i>             | --              | --                | --    | --                                 | --    | --                                 |                    | 0.21                |       | 0.12                               |       | 0.68                               |
| Endometrial cancer             |                 |                   |       |                                    |       |                                    |                    |                     |       |                                    |       |                                    |
| 1 <sup>st</sup> Quartile       | --              | --                | --    | --                                 | --    | --                                 | 19                 | 1.0 (Ref)           | 19    | 1.0 (Ref)                          | 19    | 1.0 (Ref)                          |
| 2 <sup>nd</sup> Quartile       | --              | --                | --    | --                                 | --    | --                                 | 18                 | 1.22 (0.64, 2.34)   | 14    | 1.01 (0.50, 2.02)                  | 14    | 0.70 (0.30, 1.59)                  |
| 3 <sup>rd</sup> Quartile       | --              | --                | --    | --                                 | --    | --                                 | 19                 | 1.52 (0.80, 2.89)   | 18    | 1.54 (0.80, 2.97)                  | 18    | 0.71 (0.28, 1.84)                  |
| 4 <sup>th</sup> Quartile       | --              | --                | --    | --                                 | --    | --                                 | 66                 | 4.52** (2.68, 7.60) | 60    | 4.19** (2.42, 7.23)                | 59    | 1.29 (0.47, 3.49)                  |
| <i>P for trend</i>             | --              | --                | --    | --                                 | --    | --                                 |                    | <0.01               |       | <0.01                              |       | 0.28                               |
| Colon cancer                   |                 |                   |       |                                    |       |                                    |                    |                     |       |                                    |       |                                    |
| 1 <sup>st</sup> Quartile       | 4               | 1.0 (Ref)         | 4     | 1.0 (Ref)                          | 4     | 1.0 (Ref)                          | 21                 | 1.0 (Ref)           | 21    | 1.0 (Ref)                          | 21    | 1.0 (Ref)                          |
| 2 <sup>nd</sup> Quartile       | 11              | 0.98 (0.31, 3.08) | 11    | 0.96 (0.30, 3.03)                  | 11    | 0.82 (0.24, 2.75)                  | 27                 | 1.49 (0.84, 2.64)   | 26    | 1.43 (0.80, 2.55)                  | 25    | 1.02 (0.52, 2.00)                  |
| 3 <sup>rd</sup> Quartile       | 32              | 1.94 (0.68, 5.53) | 32    | 1.87 (0.65, 5.35)                  | 32    | 1.28 (0.36, 4.56)                  | 27                 | 1.64 (0.93, 2.94)   | 27    | 1.64 (0.92, 2.94)                  | 27    | 1.13 (0.52, 2.42)                  |
| 4 <sup>th</sup> Quartile       | 35              | 2.36 (0.83, 6.71) | 34    | 2.01 (0.70, 5.82)                  | 34    | 0.99 (0.25, 3.93)                  | 33                 | 1.67 (0.95, 2.91)   | 33    | 1.60 (0.90, 2.84)                  | 33    | 1.26 (0.52, 3.07)                  |

|                          |       |                   |      |                   |      |                                 |      |                   |      |                   |      |                    |
|--------------------------|-------|-------------------|------|-------------------|------|---------------------------------|------|-------------------|------|-------------------|------|--------------------|
| <i>P for trend</i>       | <0.01 |                   | 0.03 |                   | 0.89 |                                 | 0.08 |                   | 0.11 |                   | 0.57 |                    |
| Lung cancer              |       |                   |      |                   |      |                                 |      |                   |      |                   |      |                    |
| 1 <sup>st</sup> Quartile | 4     | 1.0 (Ref)         | 4    | 1.0 (Ref)         | 3    | 1.0 (Ref)                       | 36   | 1.0 (Ref)         | 34   | 1.0 (Ref)         | 30   | 1.0 (Ref)          |
| 2 <sup>nd</sup> Quartile | 18    | 1.45 (0.49, 4.28) | 16   | 1.34 (0.45, 4.05) | 16   | 2.07 (0.59, 7.23)               | 31   | 0.87 (0.54, 1.41) | 29   | 0.91 (0.55, 1.49) | 29   | 1.09 (0.63, 1.90)  |
| 3 <sup>rd</sup> Quartile | 19    | 0.98 (0.33, 2.90) | 19   | 0.98 (0.33, 2.93) | 19   | 2.06 (0.53, 8.00)               | 36   | 1.03 (0.65, 1.65) | 35   | 0.96 (0.59, 1.56) | 35   | 1.31 (0.69, 2.49)  |
| 4 <sup>th</sup> Quartile | 32    | 1.75 (0.61, 4.99) | 31   | 1.25 (0.43, 3.65) | 31   | 3.58 <sup>†</sup> (0.84, 15.31) | 33   | 0.76 (0.47, 1.22) | 31   | 0.62 (0.37, 1.03) | 31   | 0.97 (0.43, 2.22)  |
| <i>P for trend</i>       | 0.27  |                   | 0.88 |                   | 0.09 |                                 | 0.38 |                   | 0.09 |                   | 0.84 |                    |
| Leukemia                 |       |                   |      |                   |      |                                 |      |                   |      |                   |      |                    |
| 1 <sup>st</sup> Quartile | 4     | 1.0 (Ref)         | 4    | 1.0 (Ref)         | 4    | 1.0 (Ref)                       | 10   | 1.0 (Ref)         | 10   | 1.0 (Ref)         | 10   | 1.0 (Ref)          |
| 2 <sup>nd</sup> Quartile | 14    | 1.34 (0.38, 4.07) | 14   | 1.43 (0.47, 4.38) | 14   | 1.59 (0.49, 5.12)               | 14   | 1.65 (0.73, 3.74) | 13   | 1.46 (0.64, 3.35) | 13   | 1.84 (0.74, 4.58)  |
| 3 <sup>rd</sup> Quartile | 13    | 0.89 (0.29, 2.75) | 13   | 0.98 (0.47, 4.40) | 13   | 1.23 (0.32, 4.75)               | 6    | 0.79 (2.85, 2.20) | 6    | 0.73 (0.26, 2.03) | 6    | 1.21 (0.34, 4.23)  |
| 4 <sup>th</sup> Quartile | 23    | 1.81 (0.61, 5.33) | 21   | 1.89 (0.47, 4.39) | 21   | 2.66 (0.61, 11.63)              | 14   | 1.53 (0.67, 3.51) | 13   | 1.19 (0.50, 2.87) | 13   | 2.71 (0.66, 11.07) |
| <i>P for trend</i>       | 0.24  |                   | 0.28 |                   | 0.23 |                                 | 0.59 |                   | 0.98 |                   | 0.26 |                    |
| Non-Hodgkin lymphoma     |       |                   |      |                   |      |                                 |      |                   |      |                   |      |                    |
| 1 <sup>st</sup> Quartile | 3     | 1.0 (Ref)         | 3    | 1.0 (Ref)         | 3    | 1.0 (Ref)                       | 12   | 1.0 (Ref)         | 11   | 1.0 (Ref)         | 11   | 1.0 (Ref)          |
| 2 <sup>nd</sup> Quartile | 13    | 1.70 (0.48, 5.99) | 13   | 1.80 (0.51, 6.37) | 13   | 1.55 (0.41, 5.88)               | 11   | 1.05 (0.46, 2.40) | 10   | 1.00 (0.42, 2.38) | 10   | 0.81 (0.30, 2.22)  |
| 3 <sup>rd</sup> Quartile | 12    | 1.14 (0.32, 4.08) | 12   | 1.19 (0.33, 4.30) | 12   | 0.78 (0.17, 3.52)               | 8    | 0.85 (0.34, 2.09) | 8    | 0.88 (0.35, 2.23) | 8    | 0.64 (0.19, 2.15)  |
| 4 <sup>th</sup> Quartile | 25    | 2.76 (0.82, 9.31) | 25   | 2.71 (0.79, 9.25) | 25   | 1.05 (0.21, 5.30)               | 16   | 1.40 (0.65, 3.01) | 16   | 1.43 (0.64, 3.20) | 16   | 0.97 (0.24, 3.80)  |
| <i>P for trend</i>       | 0.05  |                   | 0.08 |                   | 0.76 |                                 | 0.46 |                   | 0.42 |                   | 0.92 |                    |
| Hematological cancers    |       |                   |      |                   |      |                                 |      |                   |      |                   |      |                    |
| 1 <sup>st</sup> Quartile | 8     | 1.0 (Ref)         | 8    | 1.0 (Ref)         | 8    | 1.0 (Ref)                       | 23   | 1.0 (Ref)         | 22   | 1.0 (Ref)         | 22   | 1.0 (Ref)          |
| 2 <sup>nd</sup> Quartile | 28    | 1.36 (0.62, 3.00) | 28   | 1.45 (0.66, 3.19) | 28   | 1.42 (0.62, 3.27)               | 25   | 1.27 (0.72, 2.25) | 23   | 1.18(0.66, 2.14)  | 23   | 1.23 (0.63, 2.39)  |
| 3 <sup>rd</sup> Quartile | 25    | 0.88 (0.39, 1.97) | 25   | 0.94 (0.42, 2.11) | 25   | 0.86 (0.33, 2.27)               | 15   | 0.85 (0.44, 1.65) | 15   | 0.86 (0.44, 1.66) | 15   | 0.96 (0.41, 2.24)  |
| 4 <sup>th</sup> Quartile | 48    | 1.96 (0.92, 4.20) | 46   | 1.98 (0.91, 4.29) | 46   | 1.47 (0.51, 4.22)               | 31   | 1.46 (0.84, 2.54) | 30   | 1.36 (0.76, 2.43) | 30   | 1.70 (0.65, 4.47)  |
| <i>P for trend</i>       | 0.05  |                   | 0.08 |                   | 0.66 |                                 | 0.32 |                   | 0.45 |                   | 0.39 |                    |

Note: Hazard ratios (HRs) and 95% confidence intervals (CIs) from Cox regression models are presented

<sup>1</sup> waist-to-height-ratio quartile 1: 0.37 – 0.52 (males), 0.34 – 0.47 (females)

<sup>1</sup> waist-to-height-ratio quartile 2: 0.52 – 0.60 (males), 0.47 – 0.53 (females)

<sup>1</sup> waist-to-height-ratio quartile 3: 0.60 – 0.77 (males), 0.53 – 0.82 (females)

<sup>1</sup> waist-to-height-ratio quartile 4: 0.77 – 1.03 (males), 0.82 – 1.12 (females)

<sup>2</sup>Adjusted for: age (continuous), sex (for non sex-specific cancers), ethnicity (white/other), marital status (married or living with someone/divorced, separated, or widowed/single, never married), highest level of education (high school or less/some post-high school education/post-high school certificate or degree), total household income (\$0 to \$49,999/\$50,000 to \$99,999/≥ \$100,000), geographical area of residence (urban/rural), smoking status (current/former/never), alcohol consumption (grams of ethanol per day), energy intake (kilocalories per day), total physical activity (MET-hours per week), history of diabetes (yes/no), family history of cancer (yes/no), pack-years of cigarettes (lung cancer only), fibre intake (grams per day) (colon cancer only), menopausal status (pre-menopause/post-menopause) (breast cancer), years of birth control use (0 to 5 years/>5 years), (breast and endometrial cancers), history of breast cancer screening (yes/no) (breast cancer only), history of colon cancer screening (yes/no) (colon cancer only), and history of prostate cancer screening (yes/no) (prostate cancer only).

<sup>3</sup>Adjusted for: all variables in multivariate-analysis<sup>2</sup> as well as BMI (≥18.5 kg/m<sup>2</sup> and < 25 kg/m<sup>2</sup>/ = ≥ 25 kg/m<sup>2</sup> and < 30 kg/m<sup>2</sup>/ = ≥ 30 kg/m<sup>2</sup>).

\*\*p<0.01, \*p<0.05, †p<0.1

Supplementary Table 8. Results from analyses of BMI categories<sup>1</sup> and cancer incidence among ATP participants with BMI  $\geq 18.5$  kg/m<sup>2</sup> by smoking status (n=25 588)

|                    | All Participants Smoking Status |                     |       |                                |       |                       |
|--------------------|---------------------------------|---------------------|-------|--------------------------------|-------|-----------------------|
|                    | Cases                           | Never Smoker        | Cases | Former Smoker                  | Cases | Current Smoker        |
| All-cancer         |                                 |                     |       |                                |       |                       |
| Normal             | 242                             | 1.00 (Ref)          | 206   | 1.18 <sup>†</sup> (0.98, 1.42) | 184   | 2.04** (1.68, 2.47)   |
| Overweight         | 341                             | 1.19* (1.01, 1.40)  | 369   | 1.25** (1.06, 1.47)            | 179   | 1.65** (1.36, 2.01)   |
| Obese              | 263                             | 1.41** (1.19, 1.69) | 365   | 1.59** (1.35, 1.87)            | 123   | 1.97** (1.58, 2.45)   |
| <i>P for trend</i> |                                 | <0.01               |       | <0.01                          |       | <0.01                 |
| Lung cancer        |                                 |                     |       |                                |       |                       |
| Normal             | 6                               | 1.00 (Ref)          | 16    | 3.39** (1.33, 8.68)            | 47    | 21.76** (9.24, 51.25) |
| Overweight         | 7                               | 0.88 (0.30, 2.63)   | 26    | 2.82* (1.16, 6.87)             | 45    | 15.81** (6.71, 37.26) |
| Obese              | 5                               | 0.90 (0.27, 2.96)   | 24    | 3.17* (1.29, 7.80)             | 18    | 10.58** (4.15, 26.92) |
| <i>P for trend</i> |                                 | 0.16                |       | 0.16                           |       | 0.16                  |

Note: Hazard ratios (HRs) and 95% confidence intervals (CIs) from Cox regression models are presented

<sup>1</sup>Normal =  $\geq 18.5$  kg/m<sup>2</sup> and  $< 25$  kg/m<sup>2</sup>; Overweight =  $\geq 25$  kg/m<sup>2</sup>; Obese =  $\geq 30$  kg/m<sup>2</sup>. Those with a BMI  $< 18.5$  kg/m<sup>2</sup> were excluded from these analyses.

<sup>2</sup>Adjusted for: age (continuous), ethnicity (white/other), marital status (married or living with someone/divorced, separated, or widowed/single, never married), highest level of education (high school or less/some post-high school education/post-high school certificate or degree), total household income (\$0 to \$49,999/\$50,000 to \$99,999/ $\geq$  \$100,000), geographical area of residence (urban/rural), alcohol consumption (grams of ethanol per day), energy intake (kilocalories per day), total physical activity (MET-hours per week), history of diabetes (yes/no), family history of cancer (yes/no)

\*\*p<0.01, \*p<0.05, <sup>†</sup>p<0.1

Supplementary Table 9. Results from analyses of waist circumference<sup>1</sup> and cancer incidence among by smoking status (n=25 715)

|                    | All Participants Smoking Status |                     |       |                      |       |                        |
|--------------------|---------------------------------|---------------------|-------|----------------------|-------|------------------------|
|                    | Cases                           | Never Smoker        | Cases | Former Smoker        | Cases | Current Smoker         |
| All-cancer         |                                 |                     |       |                      |       |                        |
| Below              | 443                             | 1.00 (Ref)          | 391   | 1.09 (0.95, 1.25)    | 274   | 1.73** (1.49, 2.02)    |
| Above              | 400                             | 1.21** (1.06, 1.39) | 549   | 1.39** (1.22, 1.58)  | 221   | 1.71** (1.45, 2.02)    |
| <i>P for trend</i> |                                 | <0.01               |       | <0.01                |       | <0.01                  |
| Lung cancer        |                                 |                     |       |                      |       |                        |
| Below              | 7                               | 1.00 (Ref)          | 20    | 3.17** (1.34, 7.49)  | 70    | 29.29** (13.39, 64.08) |
| Above              | 11                              | 1.74 (0.67, 4.49)   | 46    | 5.49** (2.47, 12.21) | 46    | 19.95** (8.94, 44.55)  |
| <i>P for trend</i> |                                 | <0.01               |       | <0.01                |       | <0.01                  |

Note: Hazard ratios (HRs) and 95% confidence intervals (CIs) from Cox regression models are presented

<sup>1</sup>waist circumference below guidelines: <102 cm for men, < 88 cm for women

<sup>1</sup>waist circumference above guidelines: ≥102 cm for men, ≥88 cm for women

<sup>2</sup>Adjusted for: age (continuous), ethnicity (white/other), marital status (married or living with someone/divorced, separated, or widowed/single, never married), highest level of education (high school or less/some post-high school education/post-high school certificate or degree), total household income (\$0 to \$49,999/\$50,000 to \$99,999/≥ \$100,000), geographical area of residence (urban/rural), alcohol consumption (grams of ethanol per day), energy intake (kilocalories per day), total physical activity (MET-hours per week), history of diabetes (yes/no), family history of cancer (yes/no)

\*\*p<0.01, \*p<0.05, †p<0.1

Supplementary Table 10. Results from analyses of waist-to-hip ratio in quartiles<sup>1</sup> and cancer incidence among by smoking status (n=25 823)

|                          | All Participants Smoking Status |                     |       |                      |       |                         |
|--------------------------|---------------------------------|---------------------|-------|----------------------|-------|-------------------------|
|                          | Cases                           | Never Smoker        | Cases | Former Smoker        | Cases | Current Smoker          |
| <b>All-cancer</b>        |                                 |                     |       |                      |       |                         |
| 1 <sup>st</sup> Quartile | 212                             | 1.00 (Ref)          | 141   | 0.94 (0.76, 1.17)    | 105   | 1.83** (1.45, 2.32)     |
| 2 <sup>nd</sup> Quartile | 199                             | 0.98 (0.81, 1.19)   | 208   | 1.22* (1.00, 1.47)   | 112   | 1.66** (1.32, 2.09)     |
| 3 <sup>rd</sup> Quartile | 208                             | 1.06 (0.87, 1.29)   | 248   | 1.33** (1.10, 1.60)  | 123   | 1.62** (1.29, 2.03)     |
| 4 <sup>th</sup> Quartile | 229                             | 1.47** (1.22, 1.78) | 347   | 1.45** (1.21, 1.72)  | 159   | 1.87** (1.51, 2.31)     |
| <i>P for trend</i>       |                                 | <0.01               |       | <0.01                |       | <0.01                   |
| <b>Lung cancer</b>       |                                 |                     |       |                      |       |                         |
| 1 <sup>st</sup> Quartile | 3                               | 1.00 (Ref)          | 4     | 1.78 (0.40, 7.94)    | 28    | 39.16** (11.85, 129.37) |
| 2 <sup>nd</sup> Quartile | 2                               | 0.60 (0.10, 3.61)   | 19    | 6.58** (1.95, 22.26) | 31    | 33.33** (10.15, 109.43) |
| 3 <sup>rd</sup> Quartile | 7                               | 2.18 (0.56, 8.45)   | 17    | 5.04* (1.47, 17.25)  | 26    | 22.39** (6.75, 74.30)   |
| 4 <sup>th</sup> Quartile | 6                               | 2.37 (0.59, 9.51)   | 26    | 5.38** (1.62, 17.87) | 31    | 21.50** (6.52, 70.88)   |
| <i>P for trend</i>       |                                 | <0.01               |       | <0.01                |       | <0.01                   |

Note: Hazard ratios (HRs) and 95% confidence intervals (CIs) from Cox regression models are presented

<sup>1</sup>Quartiles of WHR for males: 1<sup>st</sup> quartile = 0.7394 - 0.9257, 2<sup>nd</sup> quartile = 0.9258 - 0.9736, 3<sup>rd</sup> quartile = 0.9737 - 1.0225, 4<sup>th</sup> quartile = 1.0226 - 1.4983.

<sup>1</sup>Quartiles of WHR for females: 1<sup>st</sup> quartile = 0.5748 - 0.7818, 2<sup>nd</sup> quartile = 0.7819 - 0.8289, 3<sup>rd</sup> quartile = 0.8290 - 0.8794, 4<sup>th</sup> quartile = 0.8795 - 1.4587.

<sup>2</sup>Adjusted for: age (continuous), ethnicity (white/other), marital status (married or living with someone/divorced, separated, or widowed/single, never married), highest level of education (high school or less/some post-high school education/post-high school certificate or degree), total household income (\$0 to \$49,999/\$50,000 to \$99,999/≥ \$100,000), geographical area of residence (urban/rural), alcohol consumption (grams of ethanol per day), energy intake (kilocalories per day), total physical activity (MET-hours per week), history of diabetes (yes/no), family history of cancer (yes/no)

\*\*p<0.01, \*p<0.05, †p<0.1
